# Supplementary material
Source: Research Square preprint supplement (doi:10.21203/rs.3.rs-9473555/v1)
Supplement: Supplementary file 1 [file ebd00d908a565f7f96bd7f7f.docx]

# **Appendix**

**Section A. Results of measuring the MRPI of rural households with different thresholds (k values)**

**Table A. 1** k=0.3

| Year | 2012 | 2014 | 2016 | 2018 | 2020 | 2022 |
| --- | --- | --- | --- | --- | --- | --- |
| Multidimensional Relative Poverty Index | 0.085 | 0.077 | 0.080 | 0.077 | 0.038 | 0.073 |
| Poverty rate (%) | 21.58 | 19.46 | 20.52 | 19.86 | 10.70 | 18.77 |
| Average Deprivation Share (%) | 39.59 | 39.41 | 38.77 | 38.62 | 35.38 | 39.06 |

**Table A. 2** k=0.4

| Year | 2012 | 2014 | 2016 | 2018 | 2020 | 2022 |
| --- | --- | --- | --- | --- | --- | --- |
| Multidimensional Relative Poverty Index | 0.053 | 0.048 | 0.047 | 0.047 | 0.013 | 0.047 |
| Poverty rate (%) | 11.68 | 10.56 | 10.47 | 10.34 | 2.88 | 10.38 |
| Average Deprivation Share (%) | 45.63 | 45.27 | 45.33 | 45.11 | 44.80 | 45.07 |

**Section B. Treatment effect heterogeneity bias**

Table B. 1 and Table B. 2 present the results after controlling for heterogeneity bias. Table B. 1 shows a lower proportion of negative weights, while Table B. 2 demonstrates significant coefficients for the independent variables, confirming the robustness of the study’s findings.

**Table B. 1** Weight and proportion of the “treated” control group

| Treat. var: LTCI | # ATTs | Σ weights |
| --- | --- | --- |
| Positive weights | 2908 | 1.0013 |
| Negative weights | 27 | -0.0013 |
| Total | 2935 | 1.0000 |

**Table B. 2** Heterogeneity test: imputation estimator

| Variable | In a state of multidimensional relative poverty |
| --- | --- |
| LTCI | -0.029***  (0.010) |
| Observations | 28844 |

**Section C. Heterogeneity Analysis**

1. **Public elderly care service capacity**

To examine the moderating effect of local elderly care service capacity on the poverty reduction impact of the LTCI, this study uses the per capita number of elderly care beds (‌the ratio of institutional elderly care beds to the population of permanent residents aged 60 and over) in each province (city) in 2021 to measure service capacity. Based on the national average level (31.2 beds per thousand people), the sample is divided into high-capacity and low-capacity groups. The heterogeneity analysis (Column (1) of Table C. 1) shows that the LTCI has a significant multidimensional poverty alleviation effect only for households in regions with weak elderly care service capacity, while its effect is insignificant for households in regions with strong capacity.

This result may stem from the substitution relationship between formal and informal care. In areas with scarce care resources, households lack market-based care alternatives, thereby bearing heavier care burdens and economic pressures. In this context, the subsidies or services provided by the LTCI yield higher marginal poverty reduction utility. Conversely, in areas with abundant resources, households may have already accessed some formal care through the market, which limits the additional benefits brought by the LTCI and thus results in an insignificant poverty reduction effect.

Table C. 1 Heterogeneity analysis

|  | (1) | | (2) | | (3) | |
| --- | --- | --- | --- | --- | --- | --- |
| Variable | Poverty status | | Public elderly care service capacity | | Conditions of medical services | |
| Transitory poverty | Persistent poverty | Low | High | Low | High |
| LTCI | -0.079*** | 0.020 | -0.027*** | -0.029 | -0.014 | -0.041*** |
| (0.029) | (0.074) | (0.009) | (0.035) | (0.013) | (0.013) |
| Control variables | Yes | Yes | Yes | Yes | Yes | Yes |
| Household FE | Yes | Yes | Yes | Yes | Yes | Yes |
| Year FE | Yes | Yes | Yes | Yes | Yes | Yes |
| N | 6853 | 1670 | 27385 | 2182 | 15355 | 14212 |
| Adjust R2 | 0.105 | 0.096 | 0.040 | 0.045 | 0.035 | 0.048 |

Note: ①*, **, and *** indicate the significance levels of 10%, 5%, and 1% respectively; ②The standard error is in parentheses; ③In the regression results of the column (3), as the panel quantile regression command does not support individual fixed effects and the framework lacks an adjusted R², this study controls for household-level variables to minimize bias; thus, the results do not include individual fixed effects or an adjusted R².

1. **Poverty status**

To examine the heterogeneous effects of the LTCI on households with different poverty depths, this study categorizes households into non-poor, transiently poor (experiencing multidimensional poverty in fewer than three survey waves), and persistently poor (in poverty for at least three waves) based on the frequency of their poverty incidence during the study period. The results in column (2) of Table C. 1 show that the LTCI has an insignificant poverty reduction effect on persistently poor households but exerts a significant alleviating effect on transiently poor households.

This discrepancy may stem from the distinct natures of the two poverty types. Persistent poverty is often associated with structural factors such as fragile household composition, deficits in human capital, or lagging regional development. Escaping such poverty requires comprehensive interventions that go beyond income support. The LTCI, primarily providing financial compensation for care, is insufficient to address the underlying disadvantages of these households. In contrast, transient poverty is frequently triggered by sudden shocks, such as disability of a family member. The immediate financial assistance provided by the LTCI can effectively buffer such shocks, helping households recover, thereby demonstrating a more pronounced poverty reduction effect.

1. **Healthcare conditions**

This study further repeats the analysis using city-level ‌medical beds per 1,000 population‌ data from 2022. The data processing and grouping methods remain consistent with the baseline analysis. The regression results (Column (3) of Table C. 1) indicate that the poverty reduction effect of the LCTI remains statistically significant only in regions with better medical service conditions‌. This further confirms that a well-developed ‌healthcare infrastructure‌ is a crucial prerequisite for the poverty alleviation function of the LTCI.
